# Supplementary material for: Wastewater-Based Epidemiology for Viral Surveillance from an Endemic Perspective: Evidence and Challenges
Source: MDPI journal article supplement (doi:10.3390/v16030482), 2024-03-20
Supplement: s1 [file s1]

## Supplementary Materials

# Wastewater-Based Epidemiology for Viral Surveillance from an Endemic Perspective: Evidence and Challenges

Marco Verani <sup>†</sup>, Alessandra Pagani <sup>†</sup>, Ileana Federigi <sup>\*</sup>, Giulia Lauretani, Nebiyu Tariku Atomsa, Virginia Rossi, Luca Viviani and Annalaura Carducci

Laboratory of Hygiene and Environmental Virology, Department of Biology, University of Pisa,  
Via S. Zeno 35/39, 56123 Pisa, Italy; marco.verani@unipi.it (M.V.);  
alessandra.pagani@phd.unipi.it (A.P.); ileana.federigi@unipi.it (I.F.);  
g.lauretani@studenti.unipi.it (G.L.); nebiyu.atomsa@phd.unipi.it (N.T.A.);  
v.rossi33@studenti.unipi.it (V.R.); luca.viviani97@gmail.com (L.V.);  
annalaura.carducci@unipi.it (A.C.)

<sup>\*</sup> Correspondence: ileana.federigi@unipi.it; Tel.: +39-0502213646

<sup>†</sup> These authors contributed equally to this work.

**Table S1.** Occurrence and viral load of HAdV according to WWTPs and seasons.

| Season      | WWTP type             | Positive samples (n°, %) | Viral load<br>Log <sub>10</sub> (GC/100,000 inh/day) |
|-------------|-----------------------|--------------------------|------------------------------------------------------|
| Autumn 2021 | WWTP1                 | 9/12, 75.0%              | 8.8 ± 2.7                                            |
|             | WWTP2                 | 9/12, 75.0%              | 8.6 ± 2.6                                            |
|             | WWTP3                 | 9/13, 69.2%              | 8.3 ± 2.8                                            |
|             | WWTP4                 | 7/12, 58.3%              | 7.7 ± 2.9                                            |
|             | <b>Total of WWTPs</b> | <b>34/49, 69.4%</b>      | <b>8.4 ± 2.7</b>                                     |
| Winter 2022 | WWTP1                 | 8/10, 80.0%              | 9.4 ± 2.7                                            |
|             | WWTP2                 | 10/10, 100%              | 10.5 ± 0.5                                           |
|             | WWTP3                 | 5/12, 41.7%              | 6.8 ± 3.2                                            |
|             | WWTP4                 | 3/12, 33.3%              | 5.8 ± 2.7                                            |
|             | <b>Total of WWTPs</b> | <b>26/44, 19.1%</b>      | <b>8.0 ± 3.1</b>                                     |
| Spring 2022 | WWTP1                 | 12/13, 92.3%             | 10.9 ± 2.0                                           |
|             | WWTP2                 | 13/13, 100%              | 11.2 ± 0.4                                           |
|             | WWTP3                 | 10/13, 76.9%             | 8.8 ± 2.7                                            |
|             | WWTP4                 | 12/13, 92.3%             | 9.9 ± 1.7                                            |
|             | <b>Total of WWTPs</b> | <b>47/52, 90.4%</b>      | <b>9.5 ± 2.7</b>                                     |
| Summer 2022 | WWTP1                 | 13/13, 100%              | 11.7 ± 0.4                                           |
|             | WWTP2                 | 13/13, 100%              | 10.9 ± 0.3                                           |
|             | WWTP3                 | 12/13, 92.3%             | 9.8 ± 1.8                                            |
|             | WWTP4                 | 13/13, 100%              | 10.7 ± 0.6                                           |
|             | <b>Total of WWTPs</b> | <b>51/52, 98.0%</b>      | <b>10.8 ± 1.2</b>                                    |
| One year    | WWTP1                 | 42/48, 87.5%             | 10.3 ± 2.3                                           |
|             | WWTP2                 | 45/48, 93.7%             | 10.3 ± 1.6                                           |
|             | WWTP3                 | 36/51, 78.6%             | 8.5 ± 2.8                                            |
|             | WWTP4                 | 35/50, 70.0%             | 8.6 ± 2.9                                            |
|             | <b>Total of WWTPs</b> | <b>158/197, 80.2%</b>    | <b>9.4 ± 2.6</b>                                     |

**Table S2.** Occurrence and viral load of enterovirus (EV) according to WWTPs and seasons.

| Season          | WWTP type             | Positive samples (n°, %) | Viral load<br>Log <sub>10</sub> (GC/100,000 inh/day) |
|-----------------|-----------------------|--------------------------|------------------------------------------------------|
| <b>Autumn</b>   | WWTP1                 | 6/12, 50.0%              | 6.5 ± 2.5                                            |
|                 | WWTP2                 | 0/12, 0%                 | 4.0 ± 0.1                                            |
|                 | WWTP3                 | 2/13, 15.4%              | 4.7 ± 1.6                                            |
|                 | WWTP4                 | 7/12, 58.3%              | 6.4 ± 2.3                                            |
|                 | <b>Total of WWTPs</b> | <b>15/49, 30.6%</b>      | <b>5.4 ± 2.1</b>                                     |
| <b>Winter</b>   | WWTP1                 | 3/10, 30.0%              | 5.5 ± 2.2                                            |
|                 | WWTP2                 | 0/10, 0%                 | 4.0 ± 0.0                                            |
|                 | WWTP3                 | 1/12, 8.3%               | 4.3 ± 1.4                                            |
|                 | WWTP4                 | 2/12, 16.7%              | 3.9 ± 0.0                                            |
|                 | <b>Total of WWTPs</b> | <b>6/44, 13.6%</b>       | <b>4.6 ± 1.6</b>                                     |
| <b>Spring</b>   | WWTP1                 | 9/13, 69.2%              | 7.5 ± 2.4                                            |
|                 | WWTP2                 | 2/13, 15.4%              | 4.5 ± 1.4                                            |
|                 | WWTP3                 | 10/13, 76.9%             | 7.1 ± 1.9                                            |
|                 | WWTP4                 | 10/13, 76.9%             | 7.6 ± 2.1                                            |
|                 | <b>Total of WWTPs</b> | <b>31/52, 59.6%</b>      | <b>6.7 ± 2.3</b>                                     |
| <b>Summer</b>   | WWTP1                 | 12/13, 92.3%             | 8.0 ± 1.4                                            |
|                 | WWTP2                 | 2/13, 15.4%              | 4.5 ± 1.3                                            |
|                 | WWTP3                 | 11/13, 84.6%             | 7.4 ± 1.7                                            |
|                 | WWTP4                 | 10/13, 76.9%             | 7.2 ± 1.9                                            |
|                 | <b>Total of WWTPs</b> | <b>35/52, 67.3%</b>      | <b>6.8 ± 2.1</b>                                     |
| <b>One year</b> | WWTP1                 | 30/48, 62.5%             | 7.0 ± 2.3                                            |
|                 | WWTP2                 | 4/48, 8.3%               | 4.3 ± 1                                              |
|                 | WWTP3                 | 24/51, 47%               | 5.9 ± 2.1                                            |
|                 | WWTP4                 | 29/50, 58.0%             | 6.6 ± 2.2                                            |
|                 | <b>Total of WWTPs</b> | <b>87/197, 44.2%</b>     | <b>5.9 ± 2.2</b>                                     |

**Table S3.** Occurrence and viral load of norovirus genogroup II (NoVgII) according to WWTPs and seasons.

| Season   | WWTP type             | Positive samples (n°, %) | Viral load<br>Log <sub>10</sub> (GC/100,000 inh/day) |
|----------|-----------------------|--------------------------|------------------------------------------------------|
| Autumn   | WWTP1                 | 11/12, 91.7%             | 9.1 ± 1.6                                            |
|          | WWTP2                 | 8/12, 66.7%              | 7.5 ± 2.6                                            |
|          | WWTP3                 | 13/13, 100%              | 8.4 ± 2.2                                            |
|          | WWTP4                 | 12/12, 100%              | 9.5 ± 0.4                                            |
|          | <b>Total of WWTPs</b> | <b>44/49, 89.8%</b>      | <b>8.6 ± 2.0</b>                                     |
| Winter   | WWTP1                 | 10/10, 100%              | 9.7 ± 0.6                                            |
|          | WWTP2                 | 8/10, 80.0%              | 8.0 ± 2.2                                            |
|          | WWTP3                 | 9/12, 75.0%              | 7.4 ± 2.5                                            |
|          | WWTP4                 | 11/12, 91.7%             | 9.2 ± 1.9                                            |
|          | <b>Total of WWTPs</b> | <b>38/44, 86.4%</b>      | <b>8.7 ± 2.0</b>                                     |
| Spring   | WWTP1                 | 11/13, 84.6%             | 8.6 ± 2.0                                            |
|          | WWTP2                 | 9/13, 69.2%              | 7.5 ± 2.5                                            |
|          | WWTP3                 | 11/13, 84.6%             | 8.1 ± 2.0                                            |
|          | WWTP4                 | 11/13, 84.6%             | 8.4 ± 2.0                                            |
|          | <b>Total of WWTPs</b> | <b>42/52, 80.8%</b>      | <b>8.2 ± 2.1</b>                                     |
| Summer   | WWTP1                 | 12/13, 92.3%             | 9.2 ± 1.7                                            |
|          | WWTP2                 | 8/13, 61.5%              | 6.7 ± 2.3                                            |
|          | WWTP3                 | 11/13, 84.6%             | 8.6 ± 2.2                                            |
|          | WWTP4                 | 13/13, 100%              | 9.1 ± 0.7                                            |
|          | <b>Total of WWTPs</b> | <b>44/52, 84.6%</b>      | <b>8.4 ± 2.1</b>                                     |
| One year | WWTP1                 | 44/48, 91.7%             | 9.1 ± 1.6                                            |
|          | WWTP2                 | 33/48, 68.7%             | 7.4 ± 2.4                                            |
|          | WWTP3                 | 42/51, 82.3%             | 8.2 ± 2.1                                            |
|          | WWTP4                 | 47/50, 94%               | 9.1 ± 1.4                                            |
|          | <b>Total of WWTPs</b> | <b>166/197, 84.3%</b>    | <b>8.5 ± 2.0</b>                                     |

**Table S4.** Occurrence and viral load of SARS-CoV-2 according to WWTPs and seasons.

| Season          | WWTP type             | Positive samples (n°, %) | Viral load<br>Log <sub>10</sub> (GC/100,000 inh/day) |
|-----------------|-----------------------|--------------------------|------------------------------------------------------|
| <b>Autumn</b>   | WWTP1                 | 6/12, 50.0%              | 6.4 ± 1.9                                            |
|                 | WWTP2                 | 5/12, 41.7%              | 6.0 ± 1.8                                            |
|                 | WWTP3                 | 8/13, 61.5%              | 6.8 ± 1.8                                            |
|                 | WWTP4                 | 9/12, 75.0%              | 7.2 ± 1.8                                            |
|                 | Total of WWTPs        | 28/49, 57.1%             | 6.6 ± 1.8                                            |
| <b>Winter</b>   | WWTP1                 | 8/10, 80.0%              | 8.1 ± 1.9                                            |
|                 | WWTP2                 | 4/10, 40.0%              | 6.0 ± 2.1                                            |
|                 | WWTP3                 | 5/12, 41.7%              | 6.5 ± 2.3                                            |
|                 | WWTP4                 | 7/12, 58.3%              | 6.6 ± 2.3                                            |
|                 | <b>Total of WWTPs</b> | <b>24/44, 54.5%</b>      | <b>6.8 ± 2.2</b>                                     |
| <b>Spring</b>   | WWTP1                 | 10/13, 76.9%             | 7.8 ± 1.9                                            |
|                 | WWTP2                 | 7/13, 53.8%              | 6.6 ± 2.1                                            |
|                 | WWTP3                 | 5/13, 38.5%              | 6.1 ± 2.3                                            |
|                 | WWTP4                 | 6/13, 46.1%              | 6.3 ± 2.1                                            |
|                 | <b>Total of WWTPs</b> | <b>28/52, 53.8%</b>      | <b>6.7 ± 2.1</b>                                     |
| <b>Summer</b>   | WWTP1                 | 6/13, 46.1%              | 6.5 ± 2.3                                            |
|                 | WWTP2                 | 5/13, 38.5%              | 5.9 ± 1.9                                            |
|                 | WWTP3                 | 4/13, 30.8%              | 5.7 ± 2.2                                            |
|                 | WWTP4                 | 5/13, 38.5%              | 6.1 ± 2.1                                            |
|                 | <b>Total of WWTPs</b> | <b>20/52, 38.5%</b>      | <b>6.0 ± 2.1</b>                                     |
| <b>One year</b> | WWTP1                 | 30/48, 62.5%             | 7.2 ± 2.1                                            |
|                 | WWTP2                 | 21/48, 43.7%             | 6.1 ± 1.9                                            |
|                 | WWTP3                 | 22/51, 43.1%             | 6.2 ± 2.1                                            |
|                 | WWTP4                 | 27/50, 54%               | 6.6 ± 2.1                                            |
|                 | <b>Total of WWTPs</b> | <b>100/197, 50.8%</b>    | <b>6.5 ± 2.1</b>                                     |
